# Supplementary material for: The role of weak Lewis acid sites for methanol thiolation
Source: Royal Society of Chemistry journal article supplement (doi:10.1039/c8cy02250j), 2018-12-06
Supplement: c8cy02250j1.pdf [file c8cy02250j1.pdf]

## Supplementary Information

The role of weak Lewis acid sites for methanol thiolation

Manuel Weber-Stockbauer,<sup>a</sup> Oliver Y. Gutiérrez<sup>a,c</sup>, Ricardo Bermejo-Deval,<sup>a\*</sup>  
Johannes A. Lercher<sup>a,b\*</sup>

<sup>a</sup>Technische Universität München, Department of Chemistry, Catalysis Research  
Center, Lichtenbergstraße 4, 85748 Garching (Germany)

<sup>b</sup>Institute for Integrated Catalysis, Pacific Northwest National Laboratory, 902 Battelle  
Boulevard, Richland, WA 99352, USA.

<sup>c</sup>Present address: Institute for Integrated Catalysis, Pacific Northwest National  
Laboratory, Richland, Washington 99354, United States

\* Corresponding authors. Fax: +49 89 28913544.

ricardo.bermejo@tum.de (R. Bermejo-Deval)

johannes.lercher@ch.tum.de (J.A. Lercher)

## S.1. Characterization

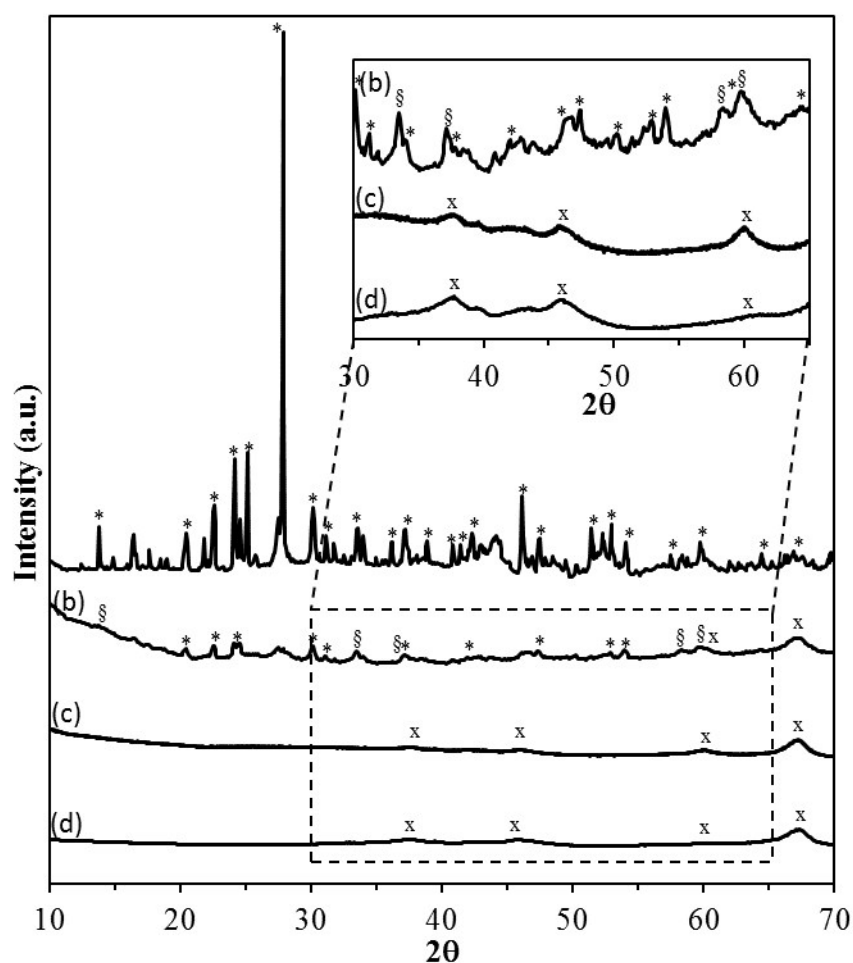

Figure S1 X-ray diffraction after sulfidation of a)  $\text{Cs}_2\text{WS}_4/\text{Al}_2\text{O}_3$ , b)  $\text{CsW}/\text{Al}_2\text{O}_3$ , c)  $\text{Cs}/\text{Al}_2\text{O}_3$  and d)  $\gamma\text{-Al}_2\text{O}_3$ . The symbols are represented as: \* as  $\text{Cs}_2\text{WS}_4$ , § as  $\text{WS}_2$  and x as  $\gamma\text{-Al}_2\text{O}_3$ .

Table S1 Raman shifts and assignments from the different sulfur anions.

| Anion                                       | Raman Shift ( $\text{cm}^{-1}$ ) | Assignment                                      |
|---------------------------------------------|----------------------------------|-------------------------------------------------|
| Sulfite ( $\text{SO}_3^{-2}$ )              | 496                              | (E) Antisymmetric $\text{SO}_3$ deformation     |
| Sulfite ( $\text{SO}_3^{-2}$ )              | 647                              | ( $A_1$ ) Symmetric $\text{SO}_3$ deformation   |
| Sulfite ( $\text{SO}_3^{-2}$ )              | 986                              | (E) Antisymmetric $\text{SO}_3$ stretching      |
| Thiosulfate ( $\text{S}_2\text{O}_3^{-2}$ ) | 323                              | (E) Symmetric S-S-O deformation                 |
| Thiosulfate ( $\text{S}_2\text{O}_3^{-2}$ ) | 452                              | ( $A_1$ ) Symmetric $\text{SO}_3$ deformation   |
| Thiosulfate ( $\text{S}_2\text{O}_3^{-2}$ ) | 656                              | ( $A_1$ ) Symmetric S- $\text{SO}_3$ stretching |
| Thiosulfate ( $\text{S}_2\text{O}_3^{-2}$ ) | 1016                             | ( $A_1$ ) Symmetric $\text{SO}_3$ stretching    |
| Dithionate ( $\text{S}_2\text{O}_6^{-2}$ )  | 204                              | ( $E_u$ ) Symmetric $\text{SO}_3$ deformation   |
| Dithionate ( $\text{S}_2\text{O}_6^{-2}$ )  | 1000                             | ( $A_{2u}$ ) Symmetric stretching               |
| Pyrosulfite ( $\text{S}_2\text{O}_5^{-2}$ ) | 660                              | ( $A_1$ ) Symmetric $\text{SO}_3$ deformation   |
| Pyrosulfite ( $\text{S}_2\text{O}_5^{-2}$ ) | 1050                             | ( $A_1$ ) Symmetric $\text{SO}_3$ stretching    |
| Dithionite ( $\text{S}_2\text{O}_4^{-2}$ )  | 508                              | ---                                             |

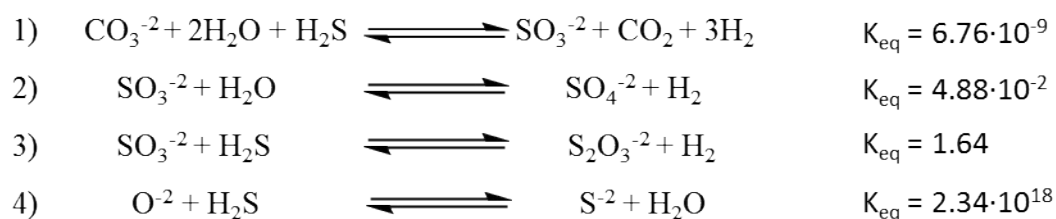

Figure S2. Plausible reactions yielding sulfur oxyanions and the corresponding equilibrium constants at 400 °C and 1 atm. The equilibrium constants were calculated with the HSC-chemistry software. The decomposition of  $\text{CO}_3^{-2}$  into  $\text{SO}_3^{-2}$  and  $\text{CO}_2$  would be driven, under flow conditions, by the continuous removal of  $\text{CO}_2$  and  $\text{H}_2$  from the system pushing the equilibrium towards the product side.

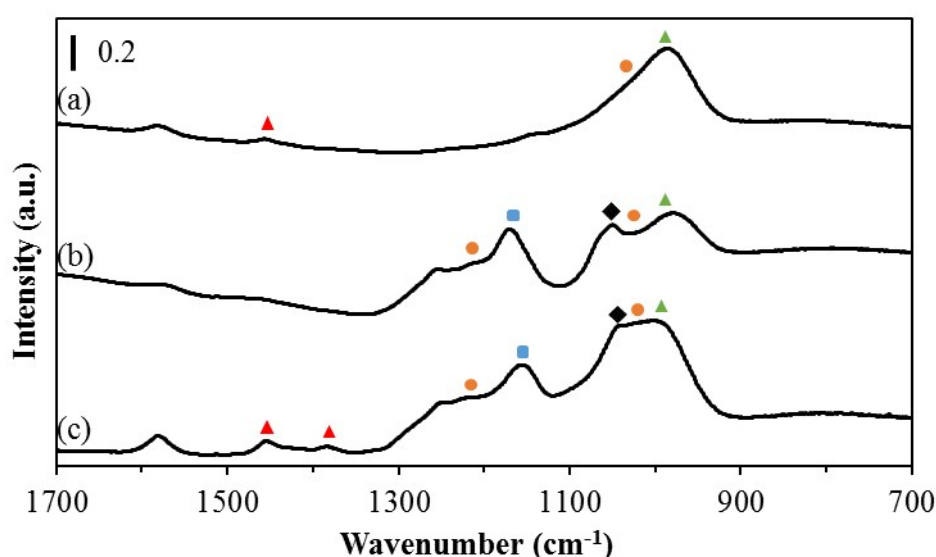

Figure S3. Infrared spectroscopy after sulfidation of a)  $\text{Cs}_2\text{WS}_4/\text{Al}_2\text{O}_3$ , b)  $\text{CsW}/\text{Al}_2\text{O}_3$  and c)  $\text{Cs}/\text{Al}_2\text{O}_3$ . The symbols are represented by anions: thiosulfate (blue square), dithionate (black diamond), pyrosulfite (orange dot), pyrosulfate (red triangle) and sulfite (green triangle).

Table S2 Infrared bands and assignments from the different sulfur anions.

| Anion                                       | IR band ( $\text{cm}^{-1}$ ) | Assignment                                   |
|---------------------------------------------|------------------------------|----------------------------------------------|
| Sulfite ( $\text{SO}_3^{-2}$ )              | 968                          | ( $A_1$ ) Symmetric $\text{SO}_3$ stretching |
| Thiosulfate ( $\text{S}_2\text{O}_3^{-2}$ ) | 1146                         | (E) Antisymmetric $\text{SO}_3$ stretching   |
| Dithionate ( $\text{S}_2\text{O}_6^{-2}$ )  | 1000                         | ( $A_{2u}$ ) Symmetric stretching            |
| Pyrosulfite ( $\text{S}_2\text{O}_5^{-2}$ ) | 970                          | ( $A_2$ ) Symmetric $\text{SO}_2$ stretching |
| Pyrosulfite ( $\text{S}_2\text{O}_5^{-2}$ ) | 1196                         | ( $A_2$ ) Symmetric $\text{SO}_3$ stretching |
| Pyrosulfate ( $\text{S}_2\text{O}_7^{-2}$ ) | 1380                         | --                                           |
| Pyrosulfate ( $\text{S}_2\text{O}_7^{-2}$ ) | 1450                         | --                                           |

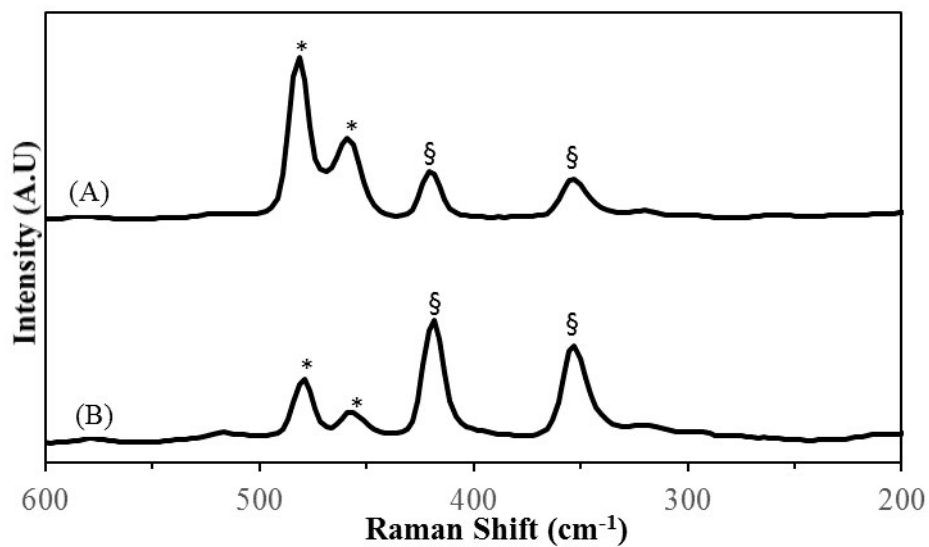

Figure S4 Raman spectra of the same  $\text{Cs}_2\text{WS}_4/\text{Al}_2\text{O}_3$  sample after (A) and before reaction (B). The symbols (\*) and (§) are assigned to the  $\text{WS}_4^{-2}$  and  $\text{WS}_2$  phases.

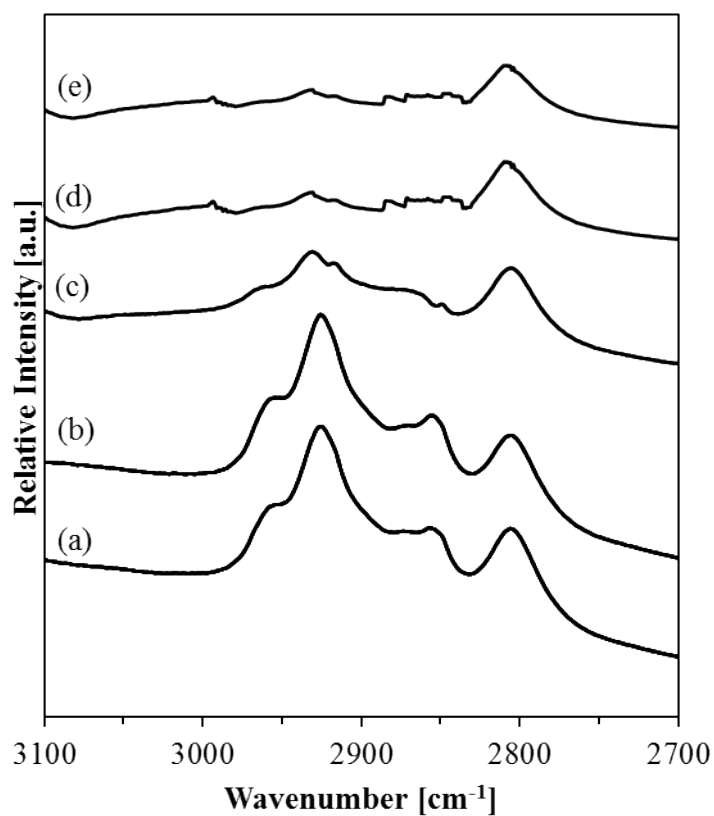

Figure S5 IR Spectra of methanol adsorbed on  $\text{CsW}/\text{Al}_2\text{O}_3$  (previously sulfided) at a) 0.1 mbar and 50 °C, b) 1 mbar and 50 °C, c) 1 mbar and 100 °C, d) 1 mbar and 150 °C, e) 10<sup>-5</sup> mbar and 300 °C.

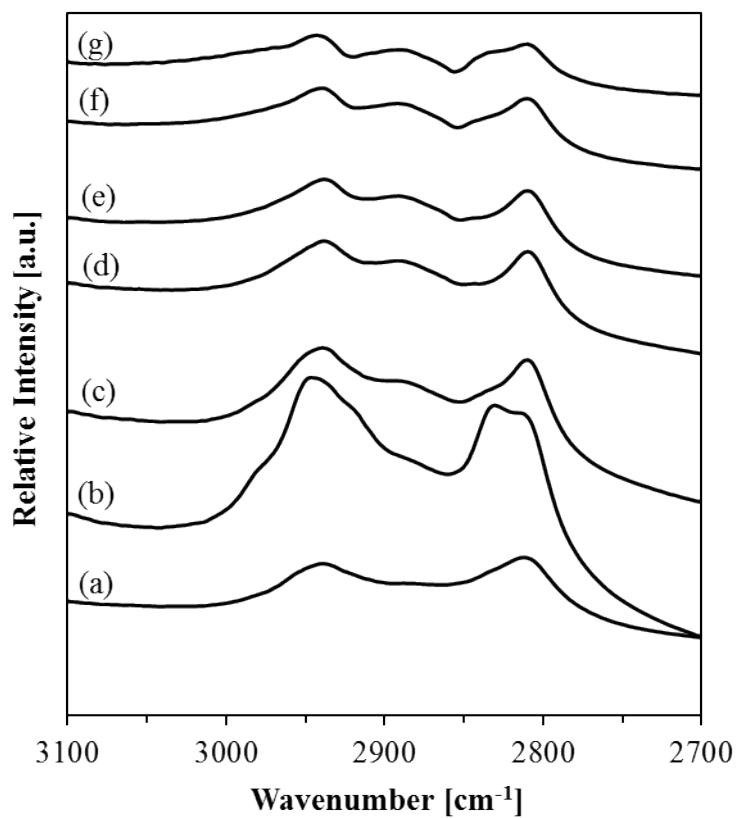

Figure S6 IR Spectra of methanol adsorbed on Cs/Al<sub>2</sub>O<sub>3</sub> (previously sulfide) at a) 0.1 mbar and 50 °C, b) 1 mbar and 50 °C, c) 1 mbar and 100 °C, d) 1 mbar and 150 °C, e) 1 mbar and 200 °C, e) 1 mbar and 250 °C and e) 1 mbar and 300 °C.

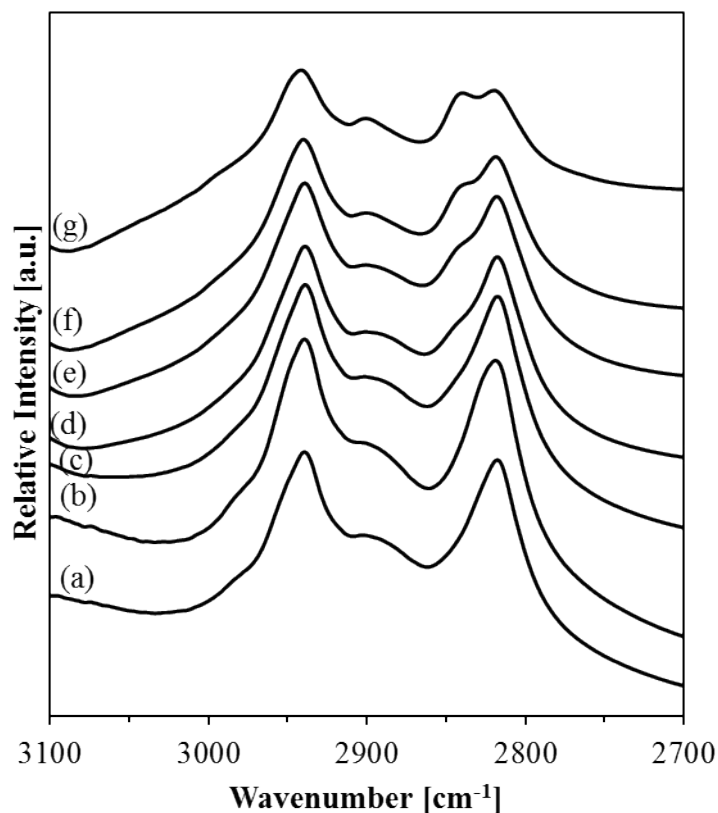

Figure S7 IR Spectra of methanol adsorbed on  $\gamma$ - $\text{Al}_2\text{O}_3$  (previously sulfided) at a) 0.1 mbar and 50 °C, b) 1 mbar and 50 °C, c) 1 mbar and 100 °C, d) 1 mbar and 150 °C, e) 1 mbar and 200 °C, e) 1 mbar and 250 °C and e) 1 mbar and 300 °C.

## S.2 Catalytic Testing and Kinetic Data

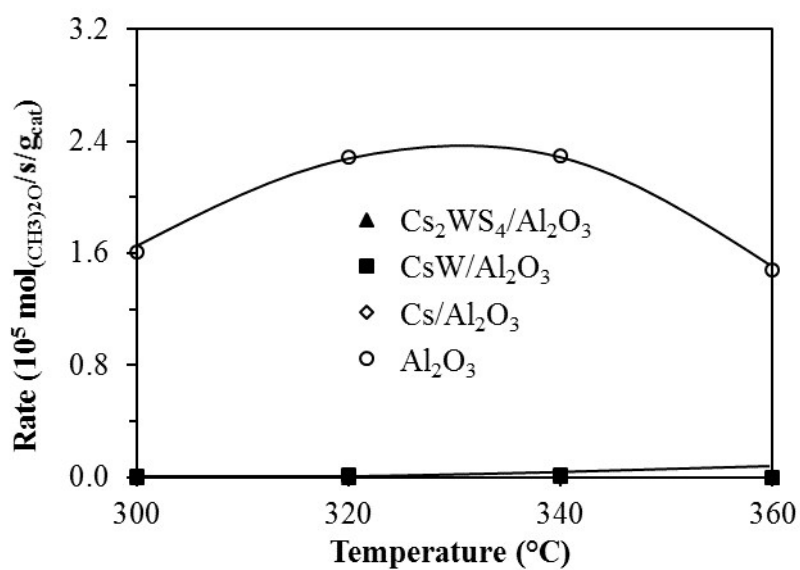

Figure S8 Dimethyl ether rate formation for  $\text{Cs}_2\text{WS}_4/\text{Al}_2\text{O}_3$ ,  $\text{CsW}/\text{Al}_2\text{O}_3$ ,  $\text{Cs}/\text{Al}_2\text{O}_3$  and  $\gamma$ - $\text{Al}_2\text{O}_3$ , in between 300-360 °C.

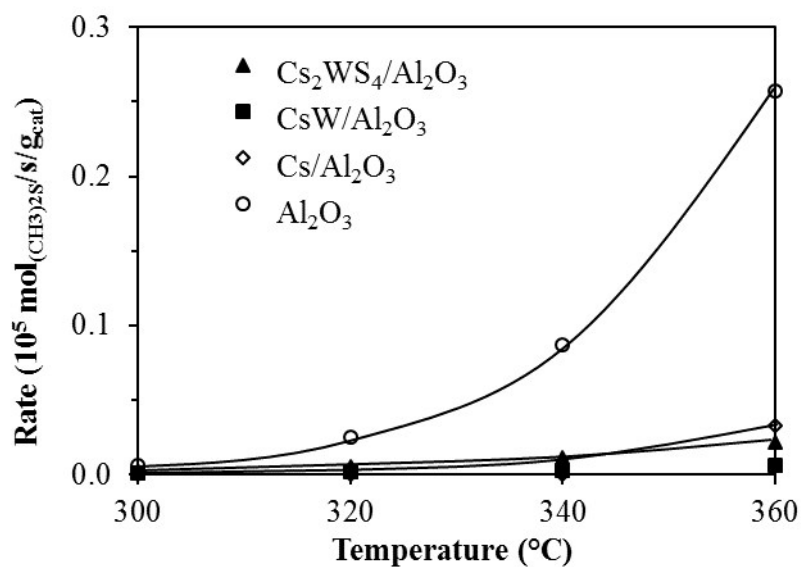

Figure S9 Dimethyl sulfide rate formation for Cs<sub>2</sub>WS<sub>4</sub>/Al<sub>2</sub>O<sub>3</sub>, CsW/Al<sub>2</sub>O<sub>3</sub>, Cs/Al<sub>2</sub>O<sub>3</sub> and  $\gamma$ -Al<sub>2</sub>O<sub>3</sub>, in between 300-360 °C.

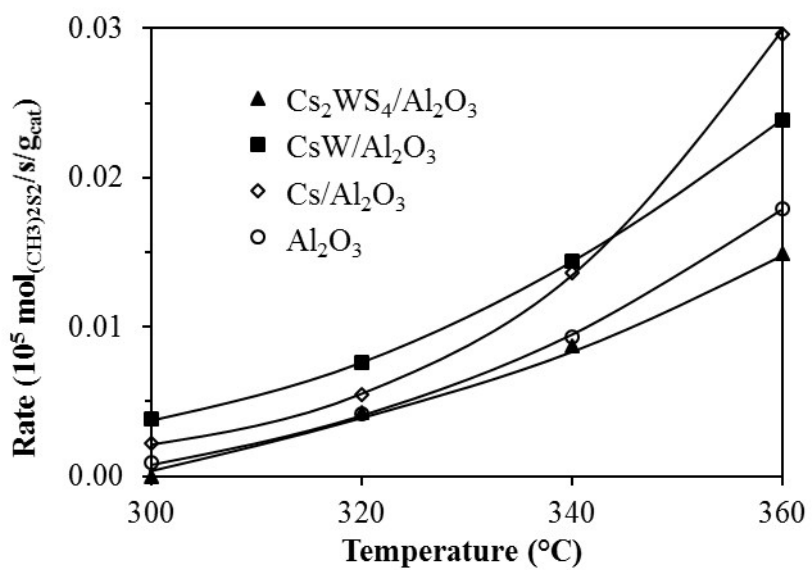

Figure S10 Dimethyl disulfide rate formation for Cs<sub>2</sub>WS<sub>4</sub>/Al<sub>2</sub>O<sub>3</sub>, CsW/Al<sub>2</sub>O<sub>3</sub>, Cs/Al<sub>2</sub>O<sub>3</sub> and  $\gamma$ -Al<sub>2</sub>O<sub>3</sub>, in between 300-360 °C.

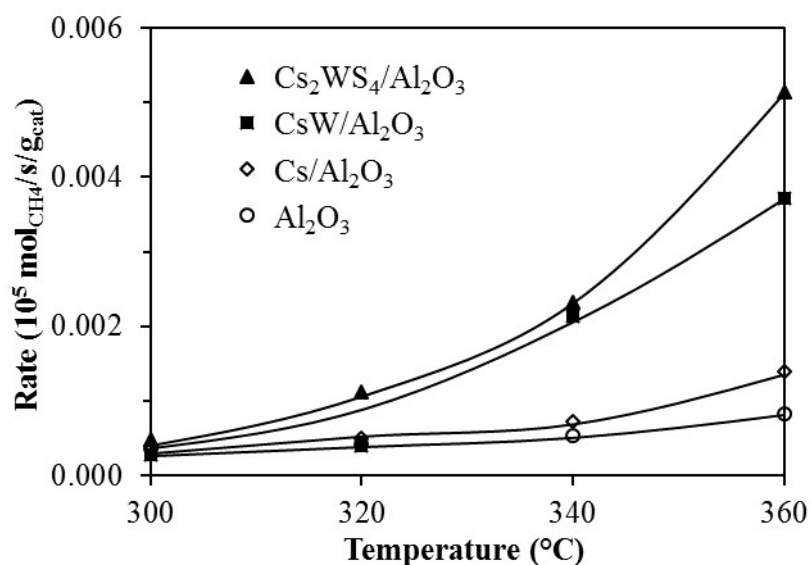

Figure S11 Methane rate formation for Cs<sub>2</sub>WS<sub>4</sub>/Al<sub>2</sub>O<sub>3</sub>, CsW/Al<sub>2</sub>O<sub>3</sub>, Cs/Al<sub>2</sub>O<sub>3</sub> and  $\gamma$ -Al<sub>2</sub>O<sub>3</sub>, in between 300-360 °C.

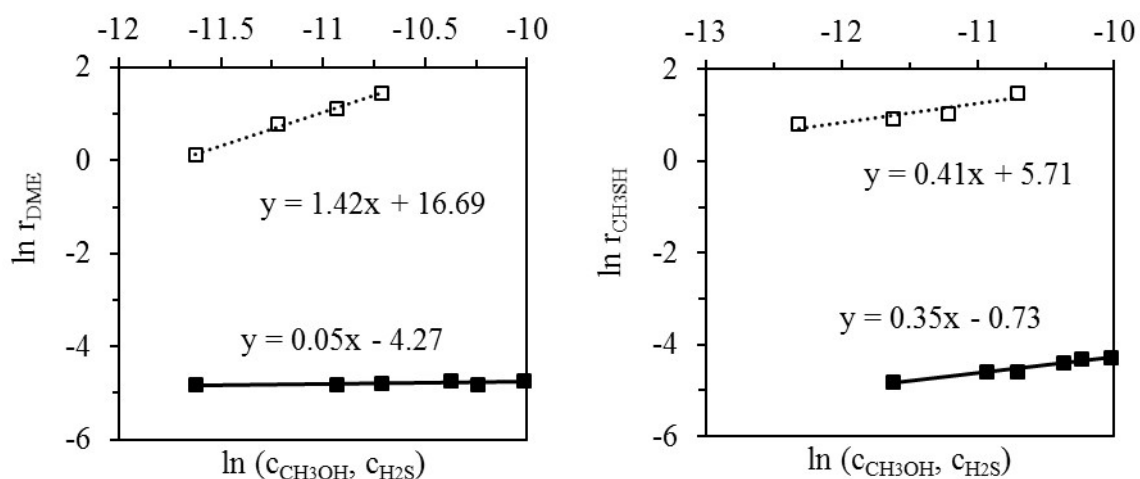

Figure S12 Left: Plot of ln rates of dimethyl ether production (Ln r<sub>DME</sub>) along with ln of partial pressure of methanol (C<sub>CH<sub>3</sub>OH</sub>, empty squares) or H<sub>2</sub>S (P<sub>H<sub>2</sub>S</sub>, filled squares) with Al<sub>2</sub>O<sub>3</sub> catalyst at 300°C and 9 bar. Right: Plot of ln rates of methanethiol production (Ln r<sub>CH<sub>3</sub>SH</sub>) along with ln of partial pressure of methanol (C<sub>CH<sub>3</sub>OH</sub>, empty squares) or H<sub>2</sub>S (P<sub>H<sub>2</sub>S</sub>, filled squares) with Al<sub>2</sub>O<sub>3</sub> catalyst at 300°C and 9 bar.



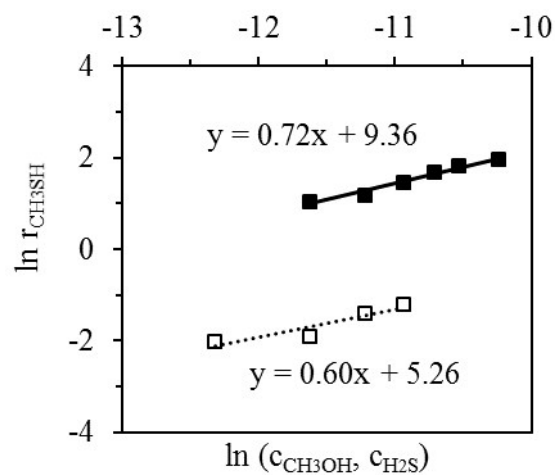

Figure S13 Plot of  $\ln$  rates of methanethiol production ( $\ln r_{\text{CH}_3\text{SH}}$ ) along with  $\ln$  of partial pressure of methanol ( $C_{\text{CH}_3\text{OH}}$ , empty squares) or  $\text{H}_2\text{S}$  ( $P_{\text{H}_2\text{S}}$ , filled squares) with  $\text{Cs}/\text{Al}_2\text{O}_3$  catalyst at  $300^\circ\text{C}$  and 9 bar.

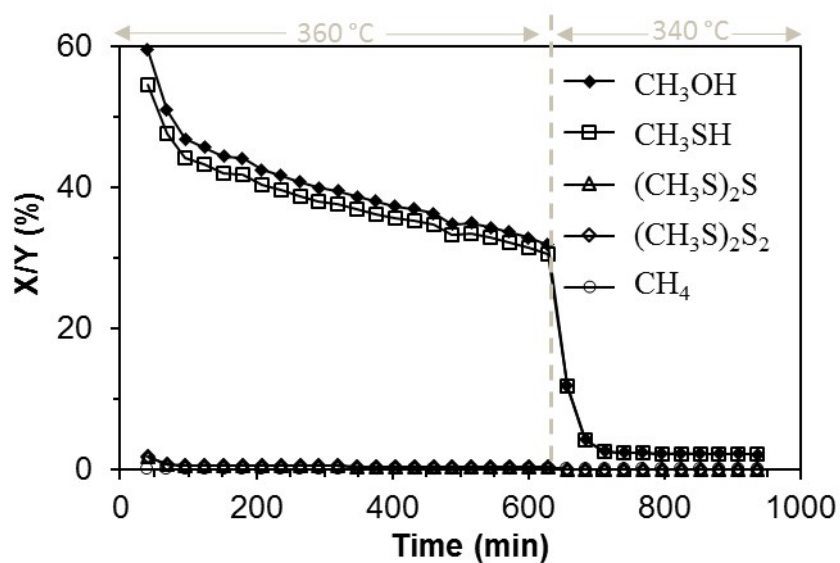

Figure S14 Methanol conversion and product yields during reaction of methanol and  $\text{H}_2\text{S}$  over  $\text{Cs}/\text{SiO}_2$  at 360 and  $340^\circ\text{C}$  under same conditions as catalytic tests.

### S.3 Derivation of bimolecular rate equations for the formation of dimethyl ether and methanethiol

The following reaction steps describe the formation of dimethyl ether (CH<sub>3</sub>OCH<sub>3</sub>) and methanethiol (CH<sub>3</sub>SH):

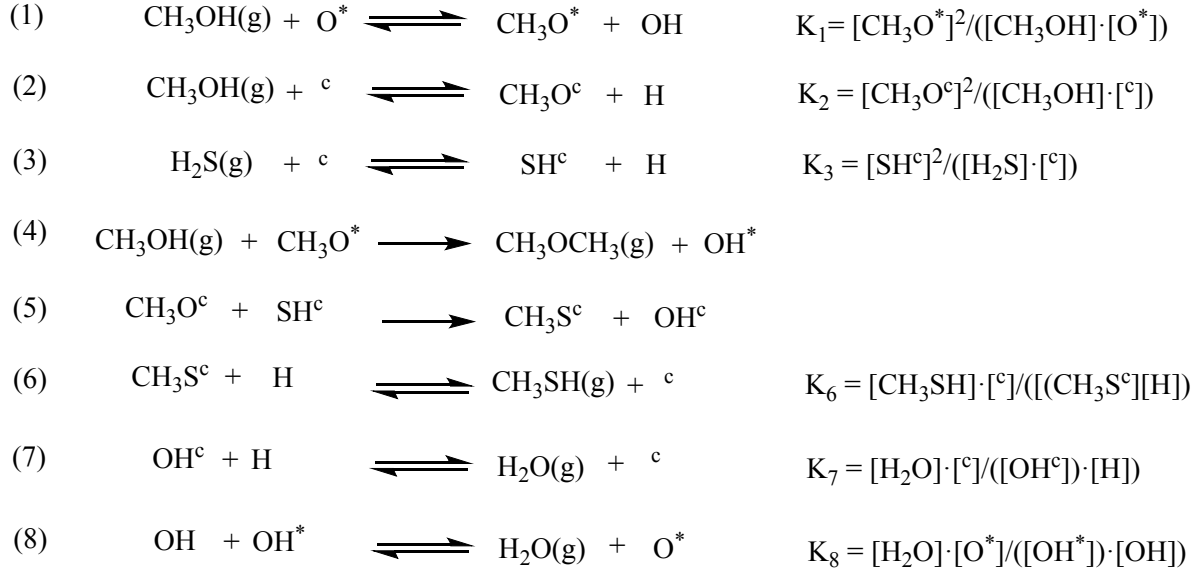

Scheme S1 Reaction kinetic steps for the formation dimethyl ether (DME) and CH<sub>3</sub>SH, being (O<sup>\*</sup>) the strong Lewis acid site and (c) the strong basic site of the Lewis acid-base pairs. The synthesis of DME follows an Eley-Rideal bimolecular reaction while the synthesis of CH<sub>3</sub>SH follows a Langmuir-Hinshelwood bimolecular reaction.

The Lewis acid-base pair (LABS) sites are taking part in the formation of the methoxy on a strong Lewis acid site and the alcoholate on a strong basic site. In both cases there is a dissociation of the methanol having both respective equal number on acid a base sites ([<sup>c</sup>] or [<sup>\*</sup>]). Assuming the Most Abundant Reaction Intermediates (MARI) and vacant sites ([<sup>c</sup>] for strong Lewis acid sites:

$$[\text{LABS}^{\text{c}}] = [\text{c}] + [\text{CH}_3\text{O}^{\text{c}}] + [\text{SH}^{\text{c}}] + [\text{OH}^{\text{c}}] + [\text{CH}_3\text{S}^{\text{c}}]$$

$$[\text{LABS}^{\text{c}}] = [\text{c}] \cdot (1 + K_2^{0.5} \cdot [\text{CH}_3\text{OH}]^{0.5} + K_3^{0.5} \cdot [\text{H}_2\text{S}]^{0.5} + K_6^{-0.5} \cdot [\text{CH}_3\text{SH}]^{0.5} + K_7^{-0.5} \cdot [\text{H}_2\text{O}]^{0.5})$$

Following the same rationale for the formation of dimethyl ether with strong Lewis acid sites:

$$[\text{LABS}^*] = [*] \cdot (1 + K_1^{0.5} \cdot [\text{CH}_3\text{OH}]^{0.5} + K_8^{-0.5} \cdot [\text{H}_2\text{O}]^{0.5})$$

Assuming reaction 3 and 4 (Scheme S1) are the rate determining steps in the formation of dimethyl ether and methanethiol, respectively, the rate expressions for these two products are the following:

$$r_{CH_3SH} = k_5 \cdot [CH_3O^c] \cdot [SH^c] = k_5 \cdot K_2^{0.5} \cdot K_3^{0.5} \cdot [CH_3OH]^{0.5} \cdot [H_2S]^{0.5} \cdot [c]^2$$

$$r_{CH_3OCH_3} = k_4 \cdot [CH_3OH] \cdot [CH_3O^*] = k_4 \cdot K_1^{0.5} \cdot [CH_3OH]^{1.5} \cdot [^*]$$

Substituting the site balance gives:

$$r_{CH_3OCH_3} = \frac{k_4 K_1^{0.5} [CH_3OH]^{1.5}}{1 + K_1^{0.5} [CH_3OH]^{0.5} + \frac{[H_2O]^{0.5}}{K_8^{0.5}}} [LABS^*]$$

$$r_{CH_3SH} = \frac{k_5 K_2^{0.5} K_3^{0.5} [CH_3OH]^{0.5} [H_2S]^{0.5}}{(1 + K_2^{0.5} [CH_3OH]^{0.5} + K_3^{0.5} [H_2S]^{0.5} + \frac{[CH_3SH]^{0.5}}{K_6^{0.5}} + \frac{[H_2O]^{0.5}}{K_7^{0.5}})^2} [LABS^c]$$
